# Supplementary material
Source: PubMed Central journal article supplement (PMC4001704)
Supplement: NIHMS564551-supplement-supplement_1.pdf [file NIHMS564551-supplement-supplement_1.pdf]

## 1417 **Supplementary Materials** 1418 **and Methods**

### 1419 *Cell Isolation and Culture*

1421 Liver cells were isolated from normal rats and mice as  
1422 described previously. Briefly, after in situ perfusion of the liver  
1423 with pronase (Boehringer Mannheim, Indianapolis, IN) fol-  
1424 lowed by collagenase (Crescent Chemical, Hauppauge, NY),  
1425 dispersed cell suspensions were layered on a discontinuous  
1426 density gradient of 8.2% and 15.6% Accudenz (Accurate  
1427 Chemical and Scientific, Westbury, NY). The resulting upper  
1428 layer consisted of >95% stellate cells. Kupffer cells were  
1429 further purified by selective plating as we have done previ-  
1430 ously.<sup>1</sup> The viability of cells was verified by phase-contrast  
1431 microscopy as well as the ability to exclude propidium iodide.  
1432 The viability of all cell cultures utilized for study was >95%.

### 1433 *Isolation of Human Peripheral* 1434 *Blood Monocytes*

1435 Monocytes were isolated from whole blood obtained  
1436 from normal human volunteers as HLA-DR<sup>+</sup>CD14<sup>+</sup>/  
1437 dim<sup>+</sup>CD3<sup>-</sup>CD20<sup>-</sup>CD56<sup>-</sup> cells by fluorescence-activated cell  
1438 sorting using modifications of a published protocol.<sup>2</sup> Briefly,  
1439 K3 EDTA blood was divided into 100- $\mu$ L aliquots and the  
1440 red blood cells were lysed for 15 minutes at room tem-  
1441 perature with 2 mL fluorescence-activated cell sorting  
1442 Lysing Solution (BD Bioscience, Franklin Lakes, NJ). After  
1443 the incubation, 2 mL nominally calcium- and magnesium-  
1444 free Corning cellgro Hanks' Balanced Salt Solution (CFH;  
1445 Mediatech, Inc., Manassas, VA) containing 3% fetal bovine  
1446 serum (FBS; Lonza, Walkersville, MD) was added to the  
1447 lysed blood and the cell suspension was centrifuged at 300g  
1448 for 5 minutes. Supernatant was removed by aspiration and  
1449 the white blood cells were resuspended in 100  $\mu$ L CFH +  
1450 3% FBS. Cells were stained with fluorochrome-conjugated  
1451 antibodies (Supplementary Table 2) for 15 minutes at  
1452 room temperature in the dark. Optimal antibody concen-  
1453 trations were determined by flow cytometry using a BD  
1454 Bioscience LSR II analytical instrument equipped with lasers  
1455 emitting at 407 nm, 488 nm, and 635 nm and filter sets  
1456 appropriate for the fluorochromes used. Stained cells were  
1457 washed with 3 mL CFH + 3% FBS and centrifuged at 300g  
1458 for 5 minutes. The pellets were re-suspended in CFH + 5%  
1459 FBS, combined, and monocytes were sorted on a BD Bio-  
1460 sciences FACSaria III sorting cytometer configured to match  
1461 the LSR II instrument according to the gating scheme  
1462 illustrated in Supplementary Figure 2. Monocyte isolation  
1463 was performed in 5 independent sessions yielding  
1464 410,000–580,000 cells each. Data files were analyzed by  
1465 FlowJo software (Treestar, Ashland, OR).

### 1466 *Measurement of Hepatic Vascular* 1467 *Permeability In Vivo*

1471 Mice were injected intravenously with 1% Evan's Blue dye  
1472 (40 mg/kg; Sigma-Aldrich) 30 minutes before sacrifice. Liver  
1473 was perfused with 4°C phosphate-buffered saline then dye  
was quantified from liver tissue by spectrophotometry at 620

nm. Results were calculated from a standard curve of Evans  
Blue (0.05–25  $\mu$ g/mL) and expressed as  $\mu$ g/g dry liver.

### 1474 *Real-Time Polymerase Chain Reaction*

1475 Messenger RNA levels were quantified by real-time reverse  
1476 transcription polymerase chain reaction (PCR) per the manu-  
1477 facturer's specifications (Stratagene, Mx3000P real-time PCR).  
1478 Primer sequences are listed in Supplementary Table 1. Total  
1479 RNA was extracted from cells or whole livers using TRIzol  
1480 (Invitrogen, Carlsbad, CA). One microgram RNA was reverse-  
1481 transcribed by using random primers and Superscript RNase  
1482 H-reverse transcriptase (Invitrogen). Samples were incubated  
1483 at 65°C for 5 minutes, 50°C for 60 minutes; reverse tran-  
1484 scriptase was inactivated by heating at 70°C for 20 minutes  
1485 and cooling at 4°C for 15 minutes. Amplification reactions were  
1486 performed with a SYBRgreen PCR master mix (Applied Bio-  
1487 systems, Carlsbad, CA). Five microliters diluted complementary  
1488 DNA samples (1:5 dilution) was used for quantitative 2-step  
1489 PCR (a 10-minute step at 95°C, followed by 50 cycles of 15  
1490 seconds at 95°C and 1 minute at 65°C) in the presence of 400  
1491 nM specific forward and reverse primers, 5 mM MgCl<sub>2</sub>, 50 mM  
1492 KCl, 10 mM Tris buffer (pH 8.3), 200  $\mu$ M deoxyadenosine  
1493 triphosphate, deoxycytidine triphosphate, deoxyguanosine  
1494 triphosphate, and 400  $\mu$ M deoxyuridine triphosphate and 1.25  
1495 U of AmpliTaq Gold DNA polymerase (Perkin-Elmer Applied  
1496 Biosystems). Each sample was analyzed in triplicate.

### 1497 *Migration Assay (Boyden Chamber)*

1498 Modified Boyden chambers (Becton Dickinson, Heidel-  
1499 berg, Germany) were used with filters (8- $\mu$ m pores; Neuro  
1500 Probe, Gaithersburg, MD) coated with collagen type-I (50  
1501  $\mu$ g/mL). Human recombinant VEGF (10 ng/mL) or vehicle  
1502 was added to the lower chamber and 3000 cells in 50  $\mu$ L  
1503 serum-free media were added to the upper chamber. After  
1504 3 hours incubation at 37°C, cells remaining on the upper  
1505 surface of filters were scraped off with a cotton swab and  
1506 cells on the lower surface were fixed with ethanol and  
1507 stained with 4',6-diamidino-2-phenylindole. Cells were  
1508 counted using the ImagePro program in 4 $\times$  low-power  
1509 fields per filter.

### 1510 *Caspase 3/7 Assay*

1511 To evaluate apoptosis, human HSC and LX-2 (1  $\times$  10<sup>4</sup>/  
1512 well) were used for caspase 3/7 assay using the manufac-  
1513 turer instructions (Apo-One Homogeneous Caspase 3/7  
1514 Assay; Promega, Madison, WI).

## 1515 **Supplementary References**

- 1516 1. Yang SQ, Lin HZ, Lane MD, et al. Obesity increases  
1517 sensitivity to endotoxin liver injury: implications for the  
1518 pathogenesis of steatohepatitis. Proc Natl Acad Sci U S A  
1519 1997;94:2557–2562.
- 1520 2. Autissier P, Soulas C, Burdo TH, et al. Evaluation of a 12-  
1521 color flow cytometry panel to study lymphocyte, mono-  
1522 cyte, and dendritic cell subsets in humans. Cytometry A  
1523 2010;77:410–419.
